# Supplementary material for: Potent suppression of hydrophobic bile acids by aldafermin, an FGF19 analogue, across metabolic and cholestatic liver diseases
Source: PubMed Central journal article supplement — JHEP Rep. 2021 Feb 19;3(3):100255. doi: 10.1016/j.jhepr.2021.100255 (PMC8056274; doi:10.1016/j.jhepr.2021.100255), 2021-02-19
Supplement: mmc1.pdf [file mmc1.pdf]

## Supplementary Material

### Potent Suppression of Hydrophobic Bile Acids by Aldafermin, an FGF19 Analogue, Across Metabolic and Cholestatic Liver Diseases

Arun J. Sanyal <sup>1</sup>, Lei Ling <sup>2</sup>, Ulrich Beuers <sup>3</sup>, Alex M. DePaoli <sup>2</sup>, Hsiao D. Lieu <sup>2</sup>, Stephen A. Harrison <sup>4,5</sup>, Gideon M. Hirschfield <sup>6</sup>

<sup>1</sup>Virginia Commonwealth University, Richmond, VA, United States

<sup>2</sup>NGM Biopharmaceuticals, South San Francisco, CA, United States

<sup>3</sup>Amsterdam University Medical Centers, Location AMC, Amsterdam, The Netherlands

<sup>4</sup>Radcliffe Department of Medicine, University of Oxford, United Kingdom

<sup>5</sup>Pinnacle Clinical Research, San Antonio, TX, United States

<sup>6</sup>Toronto Centre for Liver Disease, University Health Network, University of Toronto, Toronto, Canada

**Corresponding author:** Lei Ling, NGM Biopharmaceuticals, 333 Oyster Point Blvd., South San Francisco, CA 94080, Tel: 650-243-5546, Fax: 650-583-1646, Email: lling@ngmbio.com; or Arun J. Sanyal, Department of Internal Medicine, Division of Gastroenterology, Hepatology and Nutrition, Virginia Commonwealth University, Richmond, VA 23298, Tel: 804-828-4060, Fax: 804-828-2992, Email: arun.sanyal@vcuhealth.org

# TABLE OF CONTENT

|                                                                                                                                                           |    |
|-----------------------------------------------------------------------------------------------------------------------------------------------------------|----|
| TABLE OF CONTENT .....                                                                                                                                    | 2  |
| Supplementary Figures .....                                                                                                                               | 3  |
| Fig. S1. Potent Suppression of 7alpha-Hydroxy-4-Cholesten-3-One by Adefoermin in Patients with NASH. ....                                                 | 3  |
| Fig. S2. Adefoermin Reduces Total Cholic Acid, Total Chenodeoxycholic Acid, Total Deoxycholic Acid and Total Lithocholic Acid in Patients with NASH. .... | 5  |
| Fig. S3. Levels of DCA, G/T Ratio and the Ratio of (CA+DCA) to (CDCA+LCA) in PSC Patients Stratified by Baseline UDCA Use.....                            | 7  |
| Fig. S4. Adefoermin is Efficacious in Lowering Bile Acids in PSC Patients Who Had Baseline Serum Bile Acids >100µM. ....                                  | 8  |
| Fig. S5. Lack of Correlation Between Pro-C3 and Liver Fat Content in Patients with NASH. ....                                                             | 9  |
| Fig. S6. Serum Concentrations of Pro-C3 Correlate with Alkaline Phosphatase in Patients with PSC. .                                                       | 10 |
| Fig. S7. Hydrophobic Bile Acids Correlate with the Novel Fibrogenesis Biomarker Pro-C3 in NASH and PSC Populations When Analyzed Separately.....          | 12 |
| Supplementary Tables .....                                                                                                                                | 13 |
| Table S1. Correlation Between Changes in Bile Acids and Changes in 7alpha-Hydroxy-4-Cholesten-3-One in Patients with NASH. ....                           | 13 |
| Table S2. Baseline Demographics and Characteristics of NASH and PSC Populations. ....                                                                     | 14 |
| Table S3. Serum Levels of Pro-C3 Correlate with Fibrosis Stage at Baseline in Patients with NASH. ..                                                      | 16 |
| Table S4. Correlation Between Changes in Bile Acids and Changes in ELF Score in the Pooled NASH and PSC Populations.....                                  | 17 |
| Table S5. Correlation Between Changes in Bile Acids and Changes in ALT in the Pooled NASH and PSC Populations. ....                                       | 18 |

## Supplementary Figures

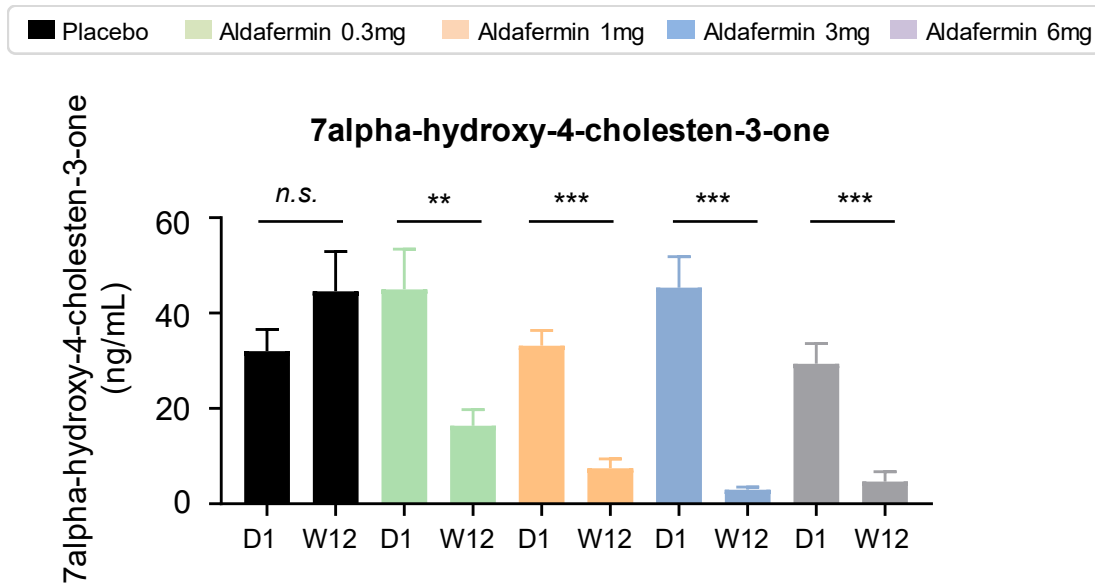

**Fig. S1. Potent Suppression of 7alpha-Hydroxy-4-Cholesten-3-One by Aldafermin in Patients with NASH.**

176 patients with biopsy-proven NASH received 0.3 mg (n=23), 1 mg (n=49), 3 mg (n=49), 6 mg (n=28) aldafermin or placebo (n=27) for 12 weeks. Serum concentrations of 7alpha-hydroxy-4-cholesten-3-one were determined using mass spectrometry methods. \*\*\*P < .001, \*\*P < .01 vs baseline (Wilcoxon test). n.s., not significant. D1, day 1; W12, week 12.

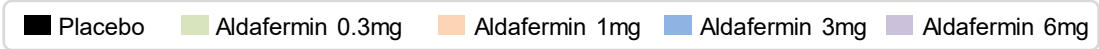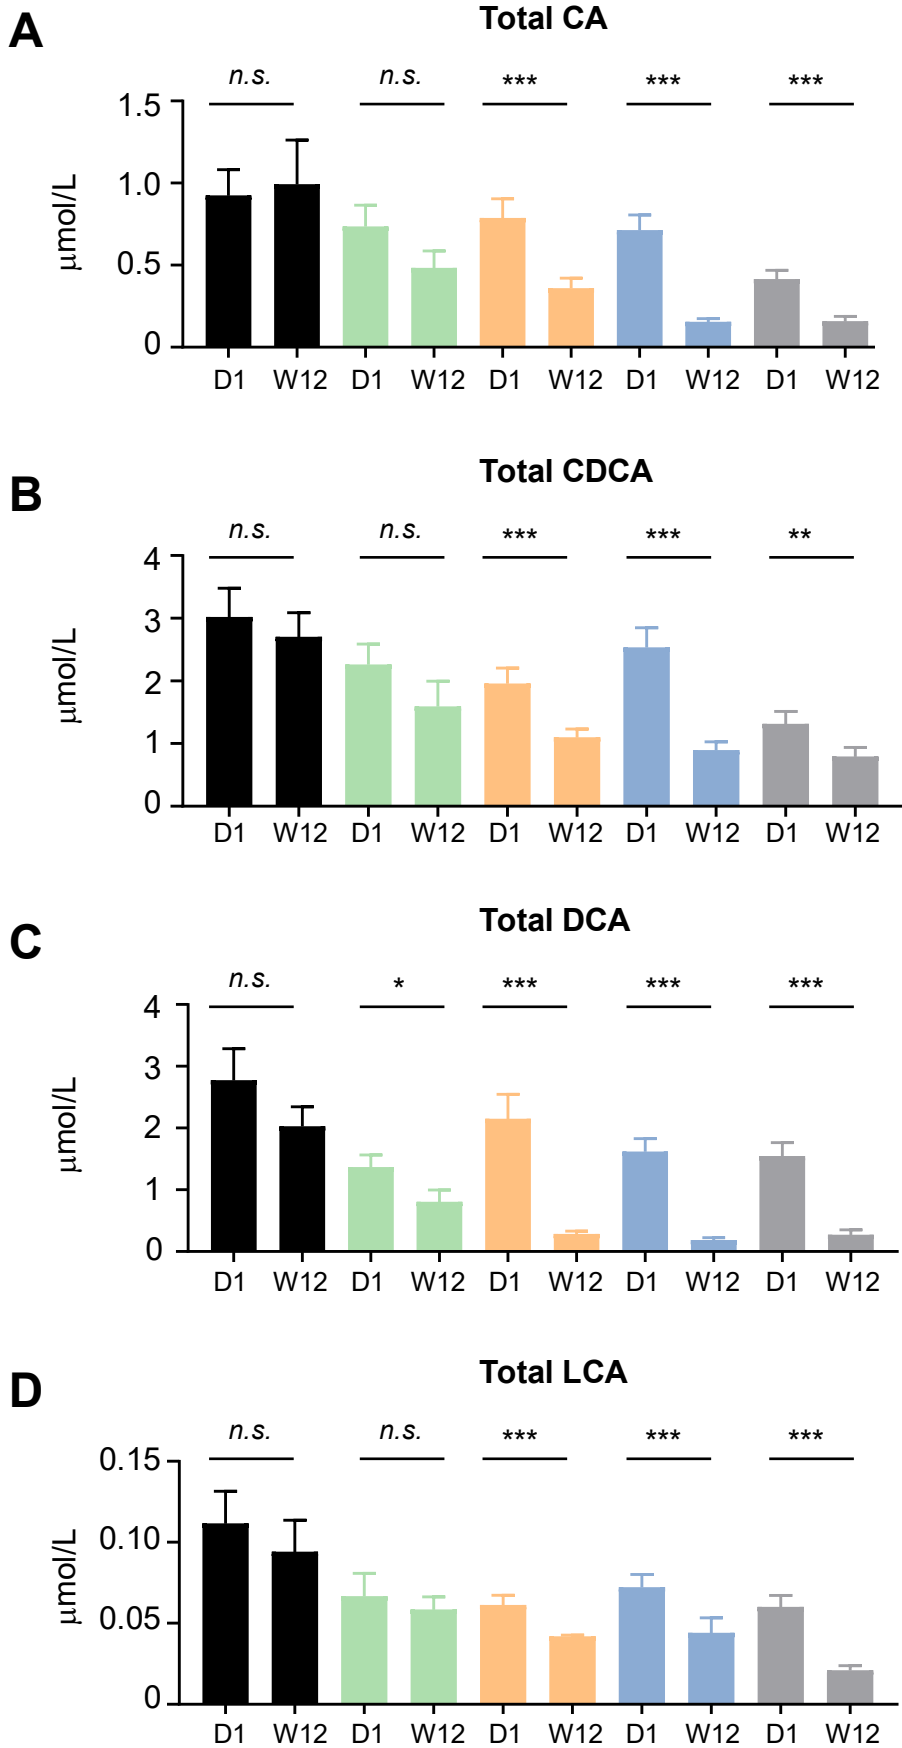

**Fig. S2. Aldafermin Reduces Total Cholic Acid, Total Chenodeoxycholic Acid, Total Deoxycholic Acid and Total Lithocholic Acid in Patients with NASH.**

176 patients with biopsy-proven NASH received 0.3 mg (n=23), 1 mg (n=49), 3 mg (n=49), 6 mg (n=28) aldafermin or placebo (n=27) for 12 weeks. Serum samples were collected at baseline (D1, day 1) and week 12 (W12, end of treatment) for bile acid profiling. **(A)** Concentrations of total CA at baseline and week 12. Total CA includes conjugated and unconjugated CA. **(B)** Concentrations of total CDCA at baseline and week 12. Total CDCA includes conjugated and unconjugated CDCA. **(C)** Concentrations of total DCA at baseline and week 12. Total DCA includes conjugated and unconjugated DCA. **(D)** Concentrations of total LCA at baseline and week 12. Total LCA includes conjugated and unconjugated LCA. \*\*\* $P < .001$ , \*\* $P < .01$ , \* $P < .05$  (Wilcoxon test). *n.s.*, not significant. CA, cholic acid; CDCA, chenocholic acid; DCA, deoxycholic acid; LCA, lithocholic acid.

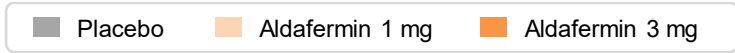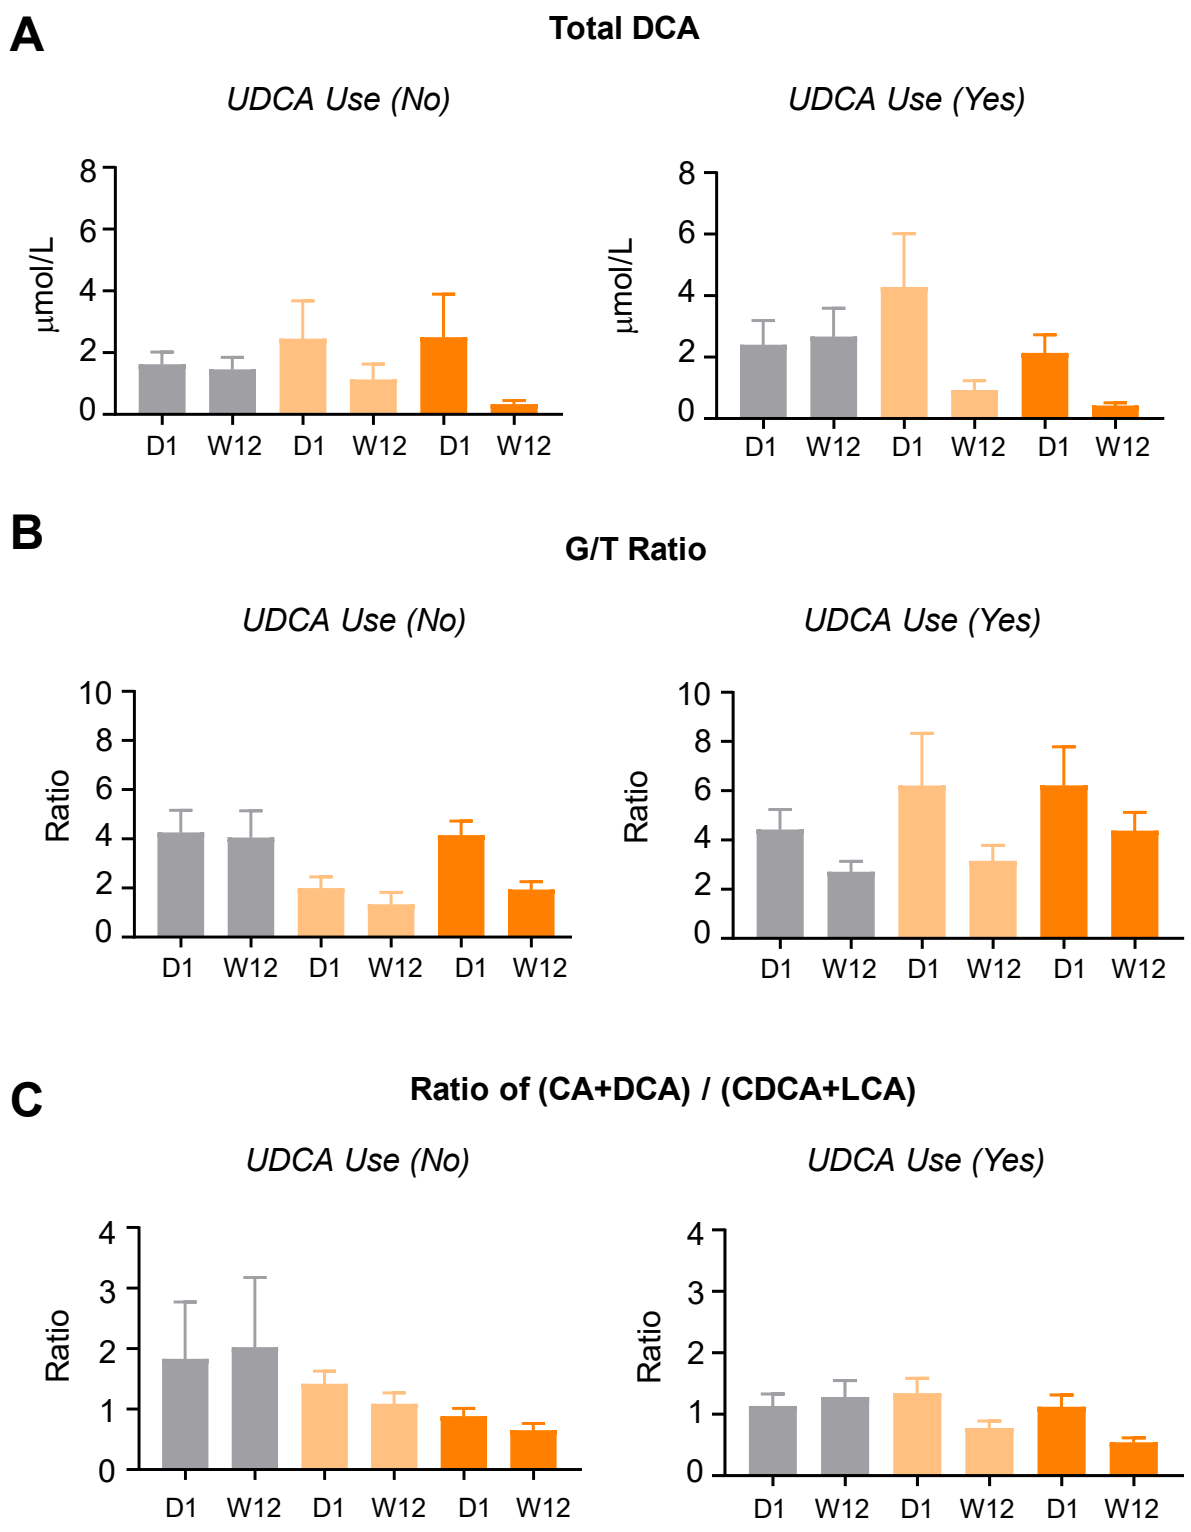

**Fig. S3. Levels of DCA, G/T Ratio and the Ratio of (CA+DCA) to (CDCA+LCA) in PSC Patients Stratified by Baseline UDCA Use.**

62 patients with PSC diagnosed according to EASL criteria received 1 mg (n=21), 3 mg (n=21) aldafermin or placebo (n=20) for 12 weeks. Serum samples were collected at baseline (D1, day 1) and week 12 (W12, end of treatment). Left panels, patients not on UDCA at baseline. Right panels, patients on UDCA at baseline. **(A)** Concentrations of total DCA at baseline and week 12. **(B)** G/T ratio at baseline and week 12. **(C)** Ratio of (CA+DCA) to (CDCA+LCA) at baseline and week 12. CA, cholic acid; CDCA, chenocholic acid; DCA, deoxycholic acid; LCA, lithocholic acid; UDCA, ursodeoxycholic acid.

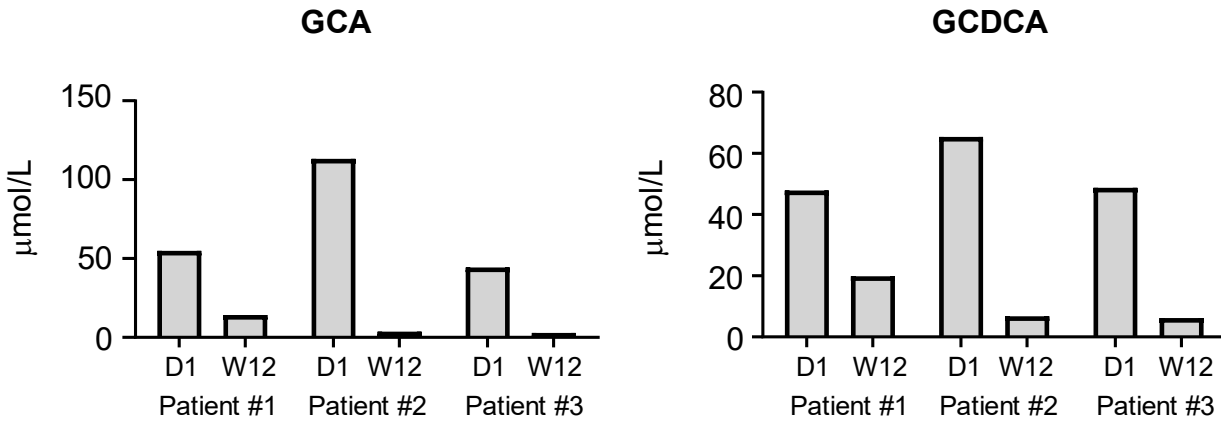

**Fig. S4. Aldafermin is Efficacious in Lowering Bile Acids in PSC Patients Who Had Baseline Serum Bile Acids  $>100\mu\text{M}$ .**

Three PSC patients had serum bile acids  $>100\mu\text{M}$  at baseline and received aldafermin 1 mg (patient #1 and patient #2) or 3 mg (patient #3) for 12 weeks. Serum samples were collected at baseline (D1, day 1) and week 12 (W12, end of treatment). **(A)** Concentrations of GCA at baseline and week 12. **(B)** Concentrations of GCDCA at baseline and week 12. GCA, glycocholic acid; GCDCA, glycochenocholic acid.



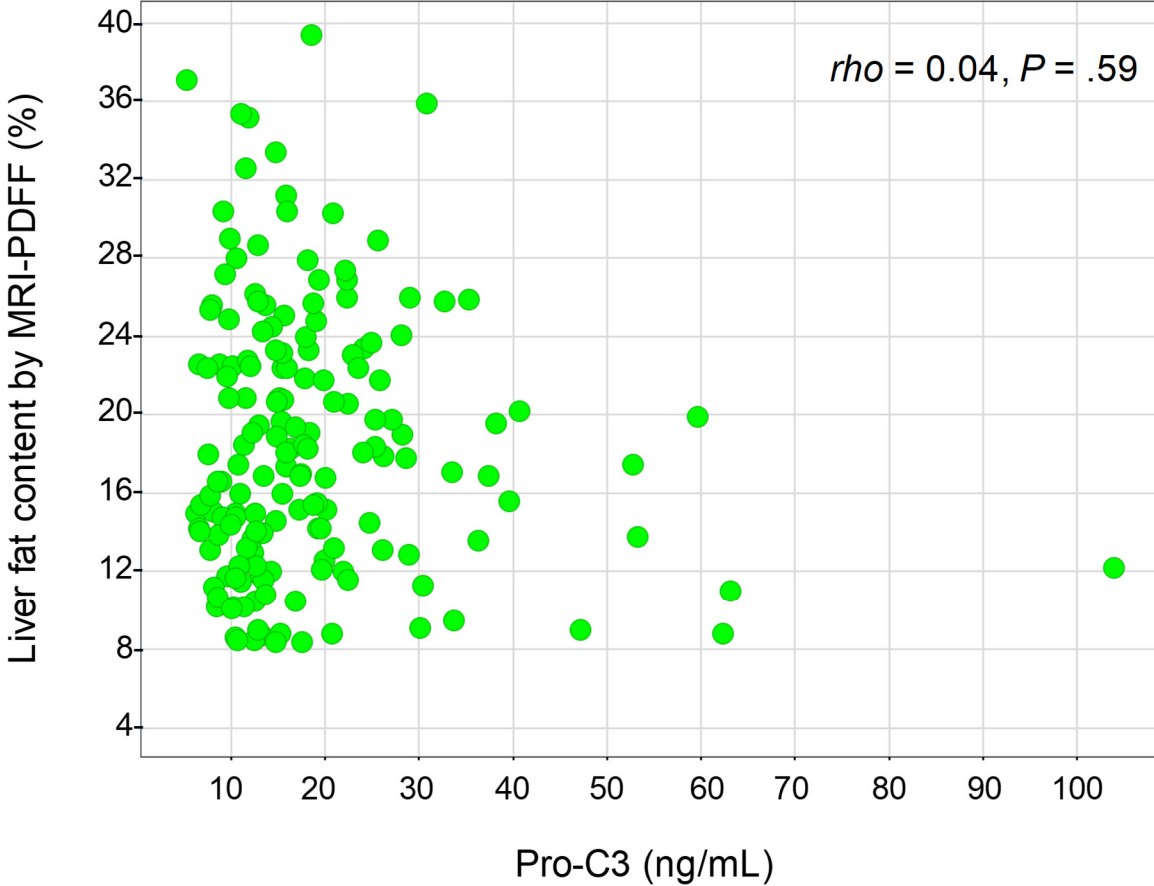

**Fig. S5. Lack of Correlation Between Pro-C3 and Liver Fat Content in Patients with NASH.**

176 patients with biopsy-proven NASH received 0.3 mg (n=23), 1 mg (n=49), 3 mg (n=49), 6 mg (n=28) aldafermin or placebo (n=27) for 12 weeks. At baseline, patients underwent magnetic resonance imaging—proton density fat fraction (MRI-PDFF) to measure liver fat content. Serum samples were collected for determination of Pro-C3 concentrations using an ELISA method. Correlation between baseline liver fat content and Pro-C3 concentration was performed using Spearman’s method. Correlation coefficient (*rho*) and *P* value are shown on the graph. Pro-C3, neoepitope-specific N-terminal pro-peptide of type III collagen.

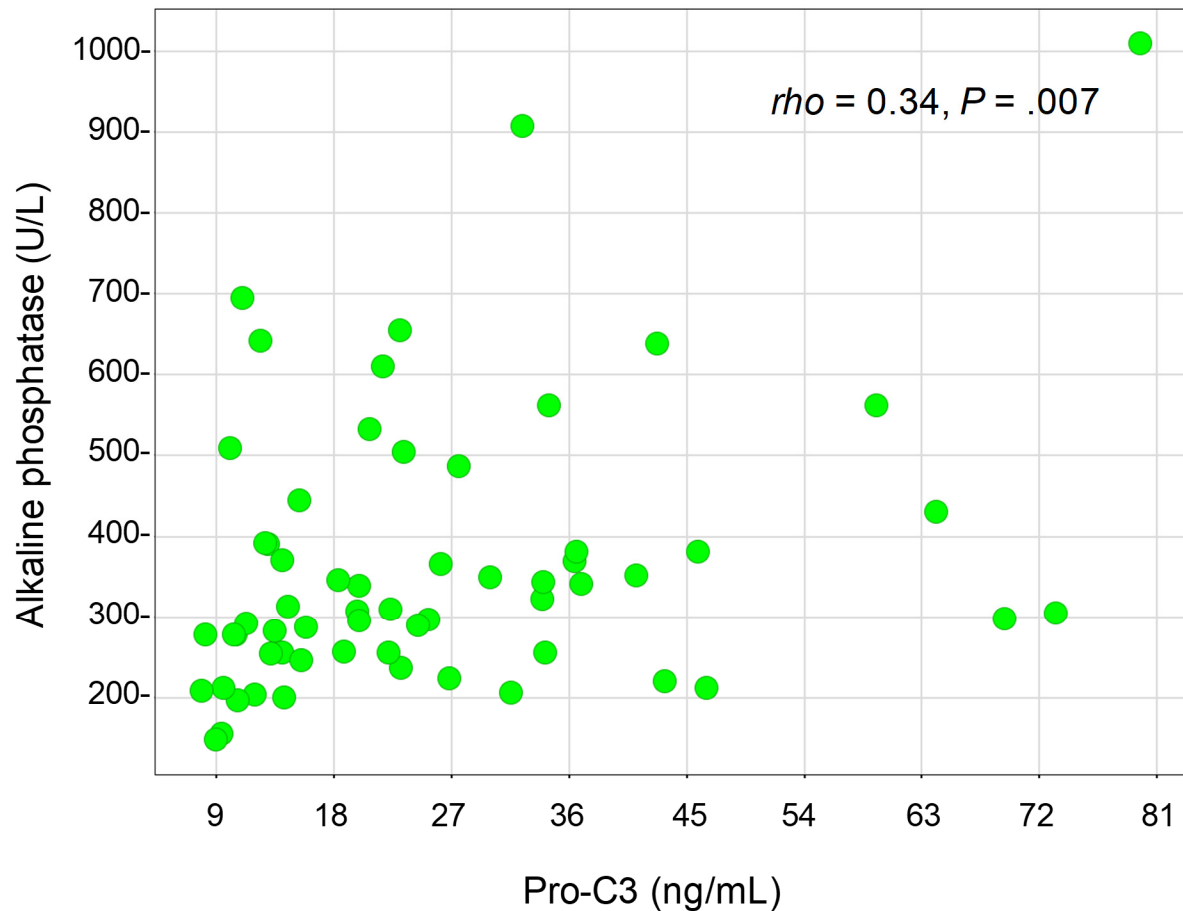

**Fig. S6. Serum Concentrations of Pro-C3 Correlate with Alkaline Phosphatase in Patients with PSC.**

62 patients with PSC diagnosed according to EASL criteria received 1 mg (n=21), 3 mg (n=21) aldafermin or placebo (n=20) for 12 weeks. At baseline, serum samples were collected for measurements of alkaline phosphatase using standard laboratory methods and Pro-C3 using an ELISA method. Correlation between baseline alkaline phosphatase and Pro-C3 was performed using Spearman's method. Correlation coefficient (*rho*) and *P* value are shown on the graph. Pro-C3, neoepitope-specific N-terminal pro-peptide of type III collagen.

**A**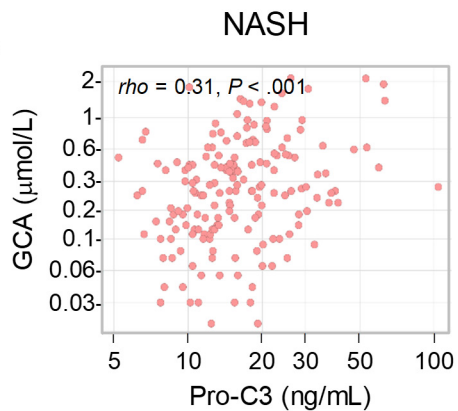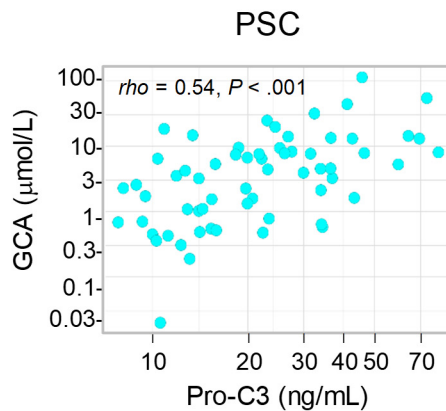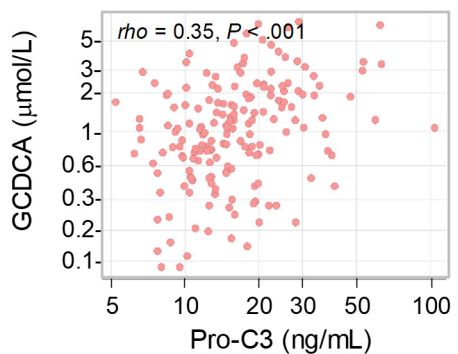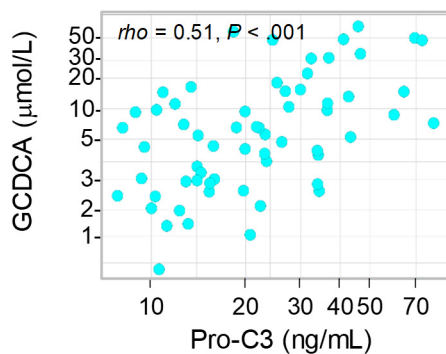**B**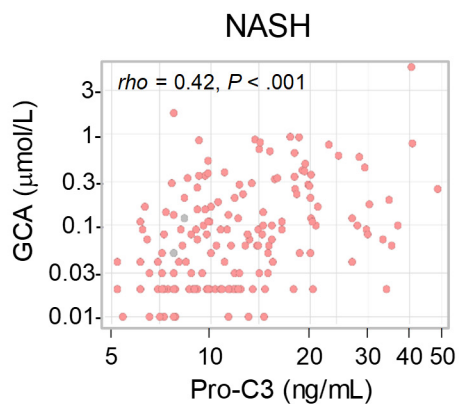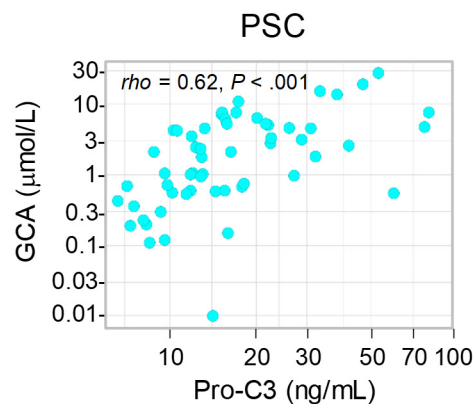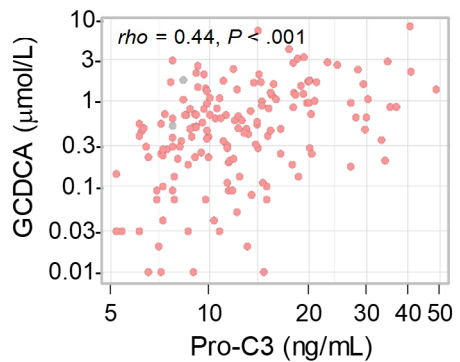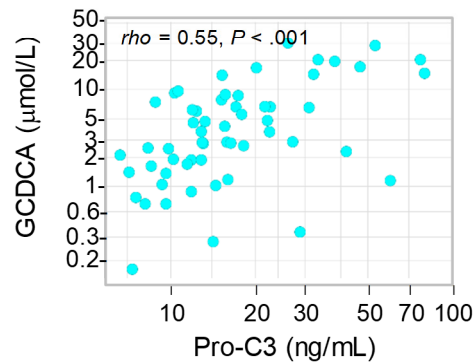

**Fig. S7. Hydrophobic Bile Acids Correlate with the Novel Fibrogenesis Biomarker Pro-C3 in NASH and PSC Populations When Analyzed Separately.**

176 patients with biopsy-proven NASH received 0.3 mg (n=23), 1 mg (n=49), 3 mg (n=49), 6 mg (n=28) aldafermin or placebo (n=27) for 12 weeks (left panels). 62 patients with PSC diagnosed according to EASL criteria received 1 mg (n=21), 3 mg (n=21) aldafermin or placebo (n=20) for 12 weeks (right panels). At baseline, serum samples were collected for measurements of bile acids using mass spectrometry method and Pro-C3 using an ELISA method. Correlation between concentrations of bile acids and Pro-C3 was performed using Spearman's method. Correlation coefficient (*rho*) and *P* value are shown on the graph. **(A)** GCA and GCDCA levels correlate with Pro-C3 at baseline in the NASH and PSC populations when analyzed separately. **(B)** GCA and GCDCA levels correlate with Pro-C3 at week 12 in the NASH and PSC populations when analyzed separately. GCA, glycocholic acid; GCDCA, glycochenocholic acid; Pro-C3, neoepitope-specific N-terminal pro-peptide of type III collagen.

## Supplementary Tables

**Table S1. Correlation Between Changes in Bile Acids and Changes in 7alpha-Hydroxy-4-Cholesten-3-One in Patients with NASH.**

| Percent Change in Bile Acids from Baseline to Week 12 | Percent Change in 7alpha-Hydroxy-4-Cholesten-3-One from Baseline to Week 12 |         |
|-------------------------------------------------------|-----------------------------------------------------------------------------|---------|
|                                                       | <i>rho</i>                                                                  | P value |
| <b>Primary bile acids</b>                             |                                                                             |         |
| <i>Glycine-conjugated primary bile acids</i>          |                                                                             |         |
| <b>GCA (μmol/L)</b>                                   | 0.48                                                                        | < .001  |
| <b>GCDCA (μmol/L)</b>                                 | 0.34                                                                        | < .001  |
| <i>Taurine-conjugated primary bile acids</i>          |                                                                             |         |
| <b>TCA (μmol/L)</b>                                   | 0.08                                                                        | .29     |
| <b>TCDCA (μmol/L)</b>                                 | -0.13                                                                       | .10     |
| <i>Unconjugated primary bile acids</i>                |                                                                             |         |
| <b>CA (μmol/L)</b>                                    | 0.36                                                                        | < .001  |
| <b>CDCA (μmol/L)</b>                                  | 0.41                                                                        | < .001  |
| <b>Secondary bile acids</b>                           |                                                                             |         |
| <i>Glycine-conjugated secondary bile acids</i>        |                                                                             |         |
| <b>GDCA (μmol/L)</b>                                  | 0.38                                                                        | < .001  |
| <b>GLCA (μmol/L)</b>                                  | 0.26                                                                        | .001    |
| <i>Taurine-conjugated secondary bile acids</i>        |                                                                             |         |
| <b>TDCA (μmol/L)</b>                                  | 0.12                                                                        | .15     |
| <b>TLCA (μmol/L)</b>                                  | 0.05                                                                        | .62     |
| <i>Unconjugated Secondary Bile Acids</i>              |                                                                             |         |
| <b>DCA (μmol/L)</b>                                   | 0.48                                                                        | < .001  |
| <b>LCA (μmol/L)</b>                                   | 0.28                                                                        | < .001  |

Shown are correlation coefficients. *P* values by Spearman's method.

CA, cholic acid; CDCA, chenodeoxycholic acid; DCA, deoxycholic acid; GCA, glycocholic acid; GCDCA, glycochenodeoxycholic acid; GDCA, glycodeoxycholic acid; GLCA, glycolithocholic acid; LCA, lithocholic acid; TCA, taurocholic acid; TCDCA, taurochenodeoxycholic acid; TDCA, taurodeoxycholic acid; TLCA, tauroolithocholic acid.

**Table S2. Baseline Demographics and Characteristics of NASH and PSC Populations.**

| Parameters                                     | NASH Patients (n=176) | PSC Patients (n=62) | P Value |
|------------------------------------------------|-----------------------|---------------------|---------|
| <b>Age (years)</b>                             | 51.2 (10.6)           | 43.2 (13.7)         |         |
| <b>Weight (kg)</b>                             | 100.2 (21.5)          | 78.6 (14.5)         |         |
| <b>BMI (kg/m<sup>2</sup>)</b>                  | 36.4 (7.1)            | 26.1 (5.1)          |         |
| <b>Sex</b>                                     |                       |                     |         |
| <b>Female</b>                                  | 121 (69%)             | 24 (39%)            |         |
| <b>Male</b>                                    | 55 (31%)              | 38 (61%)            |         |
| <b>Race</b>                                    |                       |                     |         |
| <b>Asian</b>                                   | 3 (2%)                | 1 (2%)              |         |
| <b>Black</b>                                   | 2 (1%)                | 7 (11%)             |         |
| <b>White</b>                                   | 166 (94%)             | 52 (84%)            |         |
| <b>Other</b>                                   | 5 (3%)                | 2 (3%)              |         |
| <b>Ethnicity</b>                               |                       |                     |         |
| <b>Hispanic/Latino</b>                         | 82 (47%)              | 1 (2%)              |         |
| <b>Non-Hispanic/Latino</b>                     | 94 (53%)              | 61 (98%)            |         |
| <b>Liver enzymes</b>                           |                       |                     |         |
| <b>ALP (U/L)</b>                               | 99.2 (38.3)           | 366.7 (171.3)       | < .001  |
| <b>ALT (U/L)</b>                               | 72.4 (42.9)           | 102.5 (63.6)        | < .001  |
| <b>AST (U/L)</b>                               | 54.9 (30.4)           | 78.8 (49.1)         | < .001  |
| <b>Serum bile acids</b>                        |                       |                     |         |
| <b>Primary bile acids</b>                      |                       |                     |         |
| <i>Glycine-conjugated primary bile acids</i>   |                       |                     |         |
| <b>GCA (μmol/L)</b>                            | 0.4 (0.4)             | 8.9 (16.8)          | < .001  |
| <b>GCDCA (μmol/L)</b>                          | 1.5 (1.4)             | 12.0 (15.6)         | < .001  |
| <i>Taurine-conjugated primary bile acids</i>   |                       |                     |         |
| <b>TCA (μmol/L)</b>                            | 0.1 (0.1)             | 5.0 (10.1)          | < .001  |
| <b>TCDCa (μmol/L)</b>                          | 0.2 (0.3)             | 4.2 (7.0)           | < .001  |
| <i>Unconjugated primary bile acids</i>         |                       |                     |         |
| <b>CA (μmol/L)</b>                             | 0.2 (0.4)             | 0.2 (0.3)           | 0.52    |
| <b>CDCA (μmol/L)</b>                           | 0.5 (0.8)             | 0.2 (0.3)           | .002    |
| <b>Secondary bile acids</b>                    |                       |                     |         |
| <i>Glycine-conjugated secondary bile acids</i> |                       |                     |         |
| <b>GDCA (μmol/L)</b>                           | 0.9 (1.4)             | 1.9 (2.9)           | < .001  |
| <b>GLCA (μmol/L)</b>                           | 0.03 (0.04)           | 0.19 (0.33)         | < .001  |
| <i>Taurine-conjugated secondary bile acids</i> |                       |                     |         |

|                                          |             |             |        |
|------------------------------------------|-------------|-------------|--------|
| <b>TDCA (μmol/L)</b>                     | 0.3 (0.4)   | 0.5 (0.9)   | .003   |
| <b>TLCA (μmol/L)</b>                     | 0.01 (0.01) | 0.04 (0.09) | < .001 |
| <i>Unconjugated secondary bile acids</i> |             |             |        |
| <b>DCA (μmol/L)</b>                      | 0.7 (0.7)   | 0.2 (0.3)   | < .001 |
| <b>LCA (μmol/L)</b>                      | 0.03 (0.03) | 0.06 (0.12) | .002   |

Shown are mean (SD) or n (%).

ALP, alkaline phosphatase; ALT, alanine aminotransferase; AST, aspartate aminotransferase; CA, cholic acid; CDCA, chenodeoxycholic acid; DCA, deoxycholic acid; GCA, glycocholic acid; GCDCA, glycochenodeoxycholic acid; GDCA, glycodeoxycholic acid; GLCA, glycolithocholic acid; LCA, lithocholic acid; TCA, taurocholic acid; TCDCA, taurochenodeoxycholic acid; TDCA, taurodeoxycholic acid; TLCA, tauroolithocholic acid.

**Table S3. Serum Levels of Pro-C3 Correlate with Fibrosis Stage at Baseline in Patients with NASH.**

|                               | <b>F1 (n=62)</b> | <b>F2 (n=56)</b> | <b>F3 (n=56)</b> | <b>P Value</b>   |
|-------------------------------|------------------|------------------|------------------|------------------|
| <b>Age (years)</b>            | 48.7 (11.7)      | 50.9 (10.4)      | 54.1 (9.0)       | .034             |
| <b>Weight (kg)</b>            | 96.4 (21.0)      | 100.4 (21.3)     | 104.6 (22.2)     | .15              |
| <b>BMI (kg/m<sup>2</sup>)</b> | 35.4 (7.7)       | 36.2 (6.9)       | 37.8 (6.9)       | .08              |
| <b>Serum parameters</b>       |                  |                  |                  |                  |
| <b>ALP (U/L)</b>              | 100.6 (49.5)     | 93.1 (28.1)      | 105.6 (35.6)     | .15              |
| <b>ALT (U/L)</b>              | 63.8 (36.0)      | 77.0 (49.0)      | 77.0 (44.9)      | .14              |
| <b>Pro-C3 (ng/mL)</b>         | 13.7 (6.3)       | 18.6 (10.6)      | 23.3 (16.4)      | <b>&lt; .001</b> |
| <b>Histology</b>              |                  |                  |                  |                  |
| <b>NAS</b>                    | 5.0 (1.0)        | 5.4 (1.2)        | 5.6 (1.2)        | .011             |
| <b>Ballooning</b>             | 1.2 (0.6)        | 1.5 (0.6)        | 1.6 (0.5)        | < .001           |
| <b>Inflammation</b>           | 1.5 (0.6)        | 1.8 (0.5)        | 1.9 (0.6)        | .004             |
| <b>Steatosis</b>              | 2.2 (0.7)        | 2.1 (0.8)        | 2.0 (0.7)        | .68              |

Shown are mean (SD). *P* values by Kruskal-Wallis test.

ALP, alkaline phosphatase; ALT, alanine aminotransferase; BMI, body mass index; NAS, NAFLD activity score; Pro-C3, neoepitope-specific N-terminal pro-peptide of type III collagen.



**Table S4. Correlation Between Changes in Bile Acids and Changes in ELF Score in the Pooled NASH and PSC Populations.**

| Percent Change in Bile Acids from Baseline to Week 12 | Percent Change in ELF Score from Baseline to Week 12 |         |
|-------------------------------------------------------|------------------------------------------------------|---------|
|                                                       | <i>rho</i>                                           | P value |
| <b>Primary bile acids</b>                             |                                                      |         |
| <i>Glycine-conjugated primary bile acids</i>          |                                                      |         |
| <b>GCA (μmol/L)</b>                                   | 0.32                                                 | < .001  |
| <b>GCDCA (μmol/L)</b>                                 | 0.28                                                 | < .001  |
| <i>Taurine-conjugated primary bile acids</i>          |                                                      |         |
| <b>TCA (μmol/L)</b>                                   | 0.22                                                 | .002    |
| <b>TCDCA (μmol/L)</b>                                 | 0.16                                                 | .02     |
| <i>Unconjugated primary bile acids</i>                |                                                      |         |
| <b>CA (μmol/L)</b>                                    | 0.23                                                 | .001    |
| <b>CDCA (μmol/L)</b>                                  | 0.12                                                 | .08     |
| <b>Secondary bile acids</b>                           |                                                      |         |
| <i>Glycine-conjugated secondary bile acids</i>        |                                                      |         |
| <b>GDCA (μmol/L)</b>                                  | 0.33                                                 | < .001  |
| <i>Taurine-conjugated secondary bile acids</i>        |                                                      |         |
| <b>TDCA (μmol/L)</b>                                  | 0.32                                                 | < .001  |
| <i>Unconjugated Secondary Bile Acids</i>              |                                                      |         |
| <b>DCA (μmol/L)</b>                                   | 0.29                                                 | < .001  |

Shown are correlation coefficients. *P* values by Spearman's method.

CA, cholic acid; CDCA, chenodeoxycholic acid; DCA, deoxycholic acid; ELF, enhanced liver fibrosis; GCA, glycocholic acid; GCDCA, glycochenodeoxycholic acid; GDCA, glycodeoxycholic acid; GLCA, glycolithocholic acid; LCA, lithocholic acid; TCA, taurocholic acid; TCDCA, taurochenodeoxycholic acid; TDCA, taurodeoxycholic acid; TLCA, tauroolithocholic acid.

**Table S5. Correlation Between Changes in Bile Acids and Changes in ALT in the Pooled NASH and PSC Populations.**

| Percent Change in Bile Acids from Baseline to Week 12 | Percent Change in ALT from Baseline to Week 12 |         |
|-------------------------------------------------------|------------------------------------------------|---------|
|                                                       | <i>rho</i>                                     | P value |
| <b>Primary bile acids</b>                             |                                                |         |
| <i>Glycine-conjugated primary bile acids</i>          |                                                |         |
| <b>GCA (μmol/L)</b>                                   | 0.40                                           | < .001  |
| <b>GCDCA (μmol/L)</b>                                 | 0.25                                           | < .001  |
| <i>Taurine-conjugated primary bile acids</i>          |                                                |         |
| <b>TCA (μmol/L)</b>                                   | 0.20                                           | .003    |
| <b>TCDCA (μmol/L)</b>                                 | -0.02                                          | .82     |
| <i>Unconjugated primary bile acids</i>                |                                                |         |
| <b>CA (μmol/L)</b>                                    | 0.16                                           | .02     |
| <b>CDCA (μmol/L)</b>                                  | 0.24                                           | < .001  |
| <b>Secondary bile acids</b>                           |                                                |         |
| <i>Glycine-conjugated secondary bile acids</i>        |                                                |         |
| <b>GDCA (μmol/L)</b>                                  | 0.38                                           | < .001  |
| <i>Taurine-conjugated secondary bile acids</i>        |                                                |         |
| <b>TDCA (μmol/L)</b>                                  | 0.24                                           | < .001  |
| <i>Unconjugated Secondary Bile Acids</i>              |                                                |         |
| <b>DCA (μmol/L)</b>                                   | 0.42                                           | < .001  |

Shown are correlation coefficients. *P* values by Spearman's method.

ALT, alanine aminotransferase; CA, cholic acid; CDCA, chenodeoxycholic acid; DCA, deoxycholic acid; GCA, glycocholic acid; GCDCA, glycochenodeoxycholic acid; GDCA, glycodeoxycholic acid; GLCA, glycolithocholic acid; LCA, lithocholic acid; TCA, taurocholic acid; TCDCA, taurochenodeoxycholic acid; TDCA, taurodeoxycholic acid; TLCA, tauroolithocholic acid.
